# Supplementary material for: Gene expression and methylation profiles show the involvement of POMC in primary hyperparathyroidsm
Source: Springer Nature journal article supplement (doi:10.1186/s12967-022-03568-4), 2022-08-16
Supplement: MOESM1 [file 23370728]

Table S1 Details of 43 patients' samples

|                           | Sample ID | Gender | Age (years old) | Menopause or not |
|---------------------------|-----------|--------|-----------------|------------------|
| Fresh tissues             | N01       | Female | 60              | yes              |
|                           | N02       | Male   | 45              |                  |
|                           | N03       | Male   | 35              |                  |
|                           | N04       | Female | 32              | no               |
|                           | N05       | Female | 39              | no               |
|                           | N06       | Female | 34              | no               |
|                           | N07       | Male   | 40              |                  |
|                           | N08       | Female | 39              | no               |
|                           | N09       | Female | 38              | no               |
|                           | N10       | Male   | 54              |                  |
|                           | P01       | Female | 44              | no               |
|                           | P02       | Female | 27              | no               |
|                           | P03       | Male   | 43              |                  |
|                           | P04       | Female | 47              | yes              |
|                           | P05       | Male   | 67              |                  |
|                           | P06       | Male   | 39              |                  |
|                           | P07       | Male   | 58              |                  |
|                           | P08       | Female | 53              | yes              |
|                           | P09       | Female | 42              | no               |
|                           | P10       | Female | 52              | yes              |
|                           | P11       | Male   | 52              |                  |
| P12                       | Female    | 11     | no              |                  |
| paraffin-embedded tissues | N11       | Male   | 38              |                  |
|                           | N12       | Female | 30              | no               |
|                           | N13       | Female | 53              | yes              |
|                           | N14       | Male   | 26              |                  |
|                           | N15       | Male   | 39              |                  |
|                           | N16       | Male   | 43              |                  |
|                           | N17       | Male   | 25              |                  |
|                           | N18       | Female | 53              | yes              |
|                           | N19       | Male   | 18              |                  |
|                           | N20       | Female | 28              | no               |
|                           | N21       | Female | 37              | no               |
|                           | P13       | Female | 73              | yes              |
|                           | P14       | Female | 63              | yes              |
|                           | P15       | Female | 35              | no               |
|                           | P16       | Female | 22              | no               |
|                           | P17       | Female | 42              | no               |
|                           | P18       | Male   | 25              |                  |
|                           | P19       | Female | 50              | yes              |
|                           | P20       | Female | 61              | yes              |
|                           | P21       | Female | 38              | no               |

|                              | Sample ID | Gender | age | Menopause<br>or not |
|------------------------------|-----------|--------|-----|---------------------|
|                              | P22       | Female | 58  | yes                 |
|                              | P23       | Female | 33  | no                  |
|                              | P24       | Female | 13  | no                  |
|                              | P25       | Male   | 47  |                     |
|                              | P26       | Male   | 24  |                     |
|                              | P27       | Male   | 37  |                     |
|                              | P28       | Male   | 47  |                     |
|                              | P29       | Male   | 73  |                     |
|                              | P30       | Male   | 53  |                     |
|                              | P31       | Female | 50  | no                  |
| paraffin-embedded<br>tissues | P32       | Female | 46  | no                  |
|                              | P33       | Male   | 41  |                     |
|                              | P34       | Male   | 65  |                     |
|                              | P35       | Female | 69  | yes                 |
|                              | P36       | Male   | 67  |                     |
|                              | P37       | Male   | 18  |                     |
|                              | P38       | Female | 44  | no                  |
|                              | P39       | Female | 46  | yes                 |
|                              | P40       | Male   | 18  |                     |
|                              | P41       | Female | 54  | yes                 |
|                              | P42       | Female | 65  | yes                 |
|                              | P43       | Female | 54  | yes                 |
