# Supplementary material for: Gene expression and methylation profiles show the involvement of POMC in primary hyperparathyroidsm
Source: Springer Nature journal article supplement (doi:10.1186/s12967-022-03568-4), 2022-08-16
Supplement: MOESM2 [file 23370728]

Table S2 Key Resources table

| Reagent (alphabetical order)                                              | Supplier               | Cat.No.    |
|---------------------------------------------------------------------------|------------------------|------------|
| All-in-One™ First-Strand cDNA Synthesis Kit                               | GeneCopoei             | AORT-0020  |
| All-in-One™qPCR Mix                                                       | GeneCopoei             | AOPR-0200  |
| Anti-POMC antibody [EPR17571]                                             | Abcam                  | ab210605   |
| Anti-POMC antibody                                                        | Abcam                  | ab32893    |
| Clarity Western ECL Substrate                                             | Bio-Rad                | 1705060    |
| DAB solution                                                              | Vector<br>Laboratories | SK-4105    |
| Enhanced BCA Protein Assay Kit                                            | Beyotime               | P0010      |
| EZ DNA Methylation-Gold Kits                                              | Zymo Research          | D5005      |
| Goat Anti-Rabbit IgG (H+L) HRP                                            | affinity               | S0001      |
| GNAO1 Polyclonal antibody                                                 | Proteintech            | 12635-1-AP |
| IL-6 Monoclonal antibody                                                  | Proteintech            | 66146-1-Ig |
| Protease Inhibitor Cocktail (100x)                                        | CWBIO                  | CW2200     |
| QIAamp DNA FFPE Tissue Kit                                                | QIAGEN                 | 56404      |
| RIPA buffer(high)                                                         | Solarbio               | R0010      |
| RNeasy Protect Mini Kit (50)                                              | QIAGEN                 | 74124      |
| Synaptophysin (D8F6H) XP® Rabbit mAb                                      | Cell Signaling         | 36406      |
| Tris-EDTA Antigen Repair Solution (10x) pH 9.0                            | Solarbio               | C1038      |
| Tubulin beta Antibody                                                     | affinity               | AF7011     |
| Two-Step Assay Kit (Goat Enhanced Polymer Assay System)                   | ZSGB-BIO               | PV-9003    |
| Universal two-step assay kit (mouse/rabbit enhanced polymer assay system) | ZSGB-BIO               | PV-9000    |
